# Supplementary material
Source: PubMed Central journal article supplement (PMC4699882)
Supplement: mmc1.pdf [file mmc1.pdf]

## **Supporting Materials**

### **The interaction between influenza HA fusion peptide and transmembrane domain affects membrane structure**

Alex L. Lai<sup>†</sup> and Jack H. Freed<sup>†\*</sup>

<sup>†</sup>Department of Chemistry and Chemical Biology, Cornell University, Ithaca, N.Y. 14853

## Supporting Materials

Table S0 g- and A- tensor components used for the simulations

Tables S1 to S36 summarize selected experimental results from a total of 60. The uncertainties in  $S_0$  are also shown in Table S1-S12, both from the NLLS fits and from the average over three independent experiments.

|           |                                                                                  |
|-----------|----------------------------------------------------------------------------------|
| Table S1  | Rotational Diffusion and Ordering : DMPC:DMPG:Chol=40:30:30/DPPTC/WT-FP/pH5      |
| Table S2  | Rotational Diffusion and Ordering : DMPC:DMPG:Chol=40:30:30/5PC/WT-FP/pH5        |
| Table S3  | Rotational Diffusion and Ordering : DMPC:DMPG:Chol=40:30:30/14PC/WT-FP/pH5       |
| Table S4  | Rotational Diffusion and Ordering : DMPC:DMPG:Chol=40:30:30/DPPTC/WT-FP/pH7      |
| Table S5  | Rotational Diffusion and Ordering : DMPC:DMPG:Chol=40:30:30/5PC/WT-FP/pH7        |
| Table S6  | Rotational Diffusion and Ordering : DMPC:DMPG:Chol=40:30:30/14PC/WT-FP/pH7       |
| Table S7  | Rotational Diffusion and Ordering : DMPC:DMPG:Chol=40:30:30/DPPTC/TMD/WT-FP/pH5  |
| Table S8  | Rotational Diffusion and Ordering : DMPC:DMPG:Chol=40:30:30/5PC/ TMD/WT-FP /pH5  |
| Table S9  | Rotational Diffusion and Ordering : DMPC:DMPG:Chol=40:30:30/14PC/ TMD/WT-FP /pH5 |
| Table S10 | Rotational Diffusion and Ordering : DMPC:DMPG:Chol=40:30:30/DPPTC/TMD/WT-FP/pH7  |
| Table S11 | Rotational Diffusion and Ordering : DMPC:DMPG:Chol=40:30:30/5PC/ TMD/WT-FP /pH7  |
| Table S12 | Rotational Diffusion and Ordering : DMPC:DMPG:Chol=40:30:30/14PC/ TMD/WT-FP /pH7 |
| Table S13 | Rotational Diffusion and Ordering : DMPC:DMPG:Chol=40:30:30/DPPTC/G1S-FP/pH5     |
| Table S14 | Rotational Diffusion and Ordering : DMPC:DMPG:Chol=40:30:30/5PC/G1S-FP/pH5       |
| Table S15 | Rotational Diffusion and Ordering : DMPC:DMPG:Chol=40:30:30/14PC/G1S-FP/pH5      |
| Table S16 | Rotational Diffusion and Ordering : DMPC:DMPG:Chol=40:30:30/DPPTC/TMD/G1S-FP/pH5 |
| Table S17 | Rotational Diffusion and Ordering : DMPC:DMPG:Chol=40:30:30/5PC/TMD/G1S-FP/pH5   |
| Table S18 | Rotational Diffusion and Ordering : DMPC:DMPG:Chol=40:30:30/14PC/TMD/G1S-FP/pH5  |
| Table S19 | Rotational Diffusion and Ordering : DMPC:DMPG:Chol=40:30:30/DPPTC/G1V-FP/pH5     |
| Table S20 | Rotational Diffusion and Ordering : DMPC:DMPG:Chol=40:30:30/5PC/G1V-FP/pH5       |
| Table S21 | Rotational Diffusion and Ordering : DMPC:DMPG:Chol=40:30:30/14PC/G1V-FP/pH5      |
| Table S22 | Rotational Diffusion and Ordering : DMPC:DMPG:Chol=40:30:30/DPPTC/TMD/G1V-FP/pH5 |
| Table S23 | Rotational Diffusion and Ordering : DMPC:DMPG:Chol=40:30:30/5PC/TMD/G1V-FP/pH5   |

|            |                                                                                                                                                |
|------------|------------------------------------------------------------------------------------------------------------------------------------------------|
| Table S24  | Rotational Diffusion and Ordering : DMPC:DMPG:Chol=40:30:30/14PC/TMD/G1V-FP/pH5                                                                |
| Table S25  | Rotational Diffusion and Ordering : DMPC:DMPG:Chol=40:30:30/DPPTC/W14A-FP/pH5                                                                  |
| Table S26  | Rotational Diffusion and Ordering : DMPC:DMPG:Chol=40:30:30/5PC/W14A-FP/pH5                                                                    |
| Table S27  | Rotational Diffusion and Ordering : DMPC:DMPG:Chol=40:30:30/14PC/W14A-FP/pH5                                                                   |
| Table S27  | Rotational Diffusion and Ordering : DMPC:DMPG:Chol=40:30:30/DPPTC/TMD/W14A-FP/pH5                                                              |
| Table S29  | Rotational Diffusion and Ordering : DMPC:DMPG:Chol=40:30:30/5PC/TMD/W14A-FP/pH5                                                                |
| Table S30  | Rotational Diffusion and Ordering : DMPC:DMPG:Chol=40:30:30/14PC/TMD/W14A-FP/pH5                                                               |
| Table S31  | Rotational Diffusion and Ordering : DMPC:DMPG:Chol=40:30:30/DPPTC/K183E-TMD/WT-FP/pH5                                                          |
| Table S32  | Rotational Diffusion and Ordering : DMPC:DMPG:Chol=40:30:30/5PC/K183E-TMD/WT-FP/pH5                                                            |
| Table S33  | Rotational Diffusion and Ordering : DMPC:DMPG:Chol=40:30:30/14PC/K183E-TMD/WT-FP/pH5                                                           |
| Table S34  | Rotational Diffusion and Ordering : DMPC:DMPG:Chol=40:30:30/DPPTC/L187A-TMD/WT-FP/pH5                                                          |
| Table S35  | Rotational Diffusion and Ordering : DMPC:DMPG:Chol=40:30:30/5PC/L187A-TMD/WT-FP/pH5                                                            |
| Table S36  | Rotational Diffusion and Ordering : DMPC:DMPG:Chol=40:30:30/14PC/L187A-TMD/WT-FP/pH5                                                           |
| Table S37  | Population, Rotational Diffusion and Ordering : DMPC:DMPG:Chol=40:30:30/5PC/1% TMD/WT-FP/pH5                                                   |
| Table S38  | Population, Rotational Diffusion and Ordering : DMPC:DMPG:Chol=40:30:30/5PC/2% TMD/WT-FP/pH5                                                   |
| Table S39. | Population, Rotational Diffusion and Ordering : DMPC:DMPG:Chol=40:30:30/5PC/1% TMD + 1% FP at 25°C, 30°C, and 37°C, pH5                        |
| Table S40  | Typical Correlation Matrixes of the Fittings: (A) 5PC in 1% FP in DMPC/DMPG/Chol MLV, pH5 and (B) 1% FP in 1% TMD reconstituted membranes, pH5 |
| Table S41  | Thermodynamic parameters of fusion peptide binding to lipid bilayers composed of POPC/POPG (4:1) at pH 5.                                      |
| Figure S1  | Binding of FPs to lipid only or TMD-reconstituted POPC:POPG=4:1 SUVs at 37°C by isothermal titration calorimetry.                              |
| Figure S2  | ESR Spectra of 5PC in DMPC:DMPG:Chol=40:30:30 MLVs with 1% TMD, 1% TMD + 0.5% FP and 1% TMD+1% FP, and 2% TMD recorded at 37°C.                |
| Figure S3  | ESR Spectra of WT-FP-F3C-R1 in DMPC:DMPG:Chol=40:30:30 LUVs at RT.                                                                             |
| Figure S4  | Representative ESR spectra of spin-labeled lipids in DMPC:DMPG:Chol=40:30:30 MLVs, showing the changes upon FP binding.                        |

Figure S5 Plot of  $\Delta\Delta S_0$  of DPPTC, 5PC and 14PC versus 23-mer FP concentration.

Methods Two-Component Fitting Strategy.

### S0. G- and A- tensor components used for the simulations

| System                  | $g_{xx}$ | $g_{yy}$ | $g_{zz}$ | $A_{xx}(G)$ | $A_{yy}(G)$ | $A_{zz}(G)$ |
|-------------------------|----------|----------|----------|-------------|-------------|-------------|
| DMPC/DMPG/Chol=40:30:30 |          |          |          |             |             |             |
| DPPTC                   | 2.0084   | 2.0064   | 2.0020   | 6.00        | 6.00        | 36.45       |
| 5PC                     | 2.0090   | 2.0060   | 2.0024   | 5.40        | 6.20        | 33.20       |
| 14PC                    | 2.0088   | 2.0064   | 2.0020   | 4.80        | 5.20        | 33.20       |

### S1. Rotational diffusion rates $R_{\perp}$ and $R_{||}$ , and order parameter $S_0$ of DPPTC in pure lipid vesicles vs. P/L ratio of WT FP at 37°C, pH5

| peptide/lipid (%) | $R_{\perp}$ ( $10^7 s^{-1}$ ) | $R_{  }$ ( $10^8 s^{-1}$ ) | $S_0^*$ | $\delta S_0^{**}$<br>(uncertainty<br>from fitting) | $\delta S_0^{***}$<br>(ave over<br>experiments) |
|-------------------|-------------------------------|----------------------------|---------|----------------------------------------------------|-------------------------------------------------|
| 0                 | 6.14                          | 5.12                       | 0.412   | 0.0021                                             | 0.008                                           |
| 0.125             | 6.21                          | 5.54                       | 0.413   | 0.0034                                             | 0.007                                           |
| 0.25              | 6.32                          | 5.95                       | 0.450   | 0.0014                                             | 0.005                                           |
| 0.50              | 6.17                          | 5.01                       | 0.451   | 0.0009                                             | 0.006                                           |
| 1.0               | 6.85                          | 5.40                       | 0.451   | 0.0012                                             | 0.007                                           |
| 2.0               | 6.42                          | 5.81                       | 0.451   | 0.0014                                             | 0.006                                           |

\*The  $R_{\perp}$ ,  $R_{||}$  and  $S_0$  are the average of three experiments on WT.

\*\* The uncertainty of from the fitting,  $\delta S_0$ , is obtained from those of  $C_{20}$  and  $C_{22}$  and their uncertainties, and represents the maximum uncertainty obtained in the repeated experiments.

\*\* \*The  $\delta S_0$  from the average over three experiments is the standard deviation from the repeated experiments.

### S2. Rotational diffusion rates $R_{\perp}$ and $R_{||}$ , and order parameter $S_0$ of 5PC in pure lipid vesicles vs. P/L ratio of WT FP at 37°C, pH5

| peptide/lipid (%) | $R_{\perp}$ ( $10^7 s^{-1}$ ) | $R_{  }$ ( $10^7 s^{-1}$ ) | $S_0$ | $\delta S_0$<br>(uncertainty<br>from fitting) | $\delta S_0$<br>(ave over<br>experiments) |
|-------------------|-------------------------------|----------------------------|-------|-----------------------------------------------|-------------------------------------------|
| 0                 | 3.80                          | 4.47                       | 0.512 | 0.0017                                        | 0.007                                     |
| 0.125             | 3.41                          | 4.28                       | 0.512 | 0.0016                                        | 0.006                                     |
| 0.25              | 3.79                          | 4.60                       | 0.546 | 0.0023                                        | 0.006                                     |
| 0.50              | 2.98                          | 4.52                       | 0.556 | 0.0017                                        | 0.005                                     |
| 1.0               | 3.17                          | 4.54                       | 0.557 | 0.0016                                        | 0.007                                     |
| 2.0               | 3.16                          | 4.73                       | 0.557 | 0.0018                                        | 0.007                                     |

**S3. Rotational diffusion rates  $R_{\perp}$  and  $R_{||}$ , and order parameter  $S_0$  of 14PC in pure lipid vesicles vs. P/L ratio of WT FP at 37°C, pH5**

| peptide/lipid (%) | $R_{\perp}$ ( $10^8 s^{-1}$ ) | $R_{  }$ ( $10^9 s^{-1}$ ) | $S_0$ | $\delta S_0$<br>(uncertainty<br>from fitting) | $\delta S_0$<br>(ave over<br>experiments) |
|-------------------|-------------------------------|----------------------------|-------|-----------------------------------------------|-------------------------------------------|
| 0                 | 1.28                          | 1.94                       | 0.247 | 0.0009                                        | 0.005                                     |
| 0.125             | 1.15                          | 1.85                       | 0.247 | 0.0023                                        | 0.004                                     |
| 0.25              | 1.04                          | 1.57                       | 0.246 | 0.0012                                        | 0.006                                     |
| 0.50              | 1.05                          | 1.56                       | 0.247 | 0.0031                                        | 0.006                                     |
| 1.0               | 1.10                          | 1.62                       | 0.248 | 0.0029                                        | 0.005                                     |
| 2.0               | 1.09                          | 1.77                       | 0.247 | 0.0015                                        | 0.004                                     |

**S4. Rotational diffusion rates  $R_{\perp}$  and  $R_{||}$ , and order parameter  $S_0$  of DPPTC in pure lipid vesicles vs. P/L ratio of WT FP at 37°C, pH7**

| peptide/lipid (%) | $R_{\perp}$ ( $10^7 s^{-1}$ ) | $R_{  }$ ( $10^8 s^{-1}$ ) | $S_0$ | $\delta S_0$<br>(uncertainty<br>from fitting) | $\delta S_0$<br>(ave over<br>experiments) |
|-------------------|-------------------------------|----------------------------|-------|-----------------------------------------------|-------------------------------------------|
| 0                 | 6.24                          | 5.25                       | 0.412 | 0.0027                                        | 0.006                                     |
| 0.125             | 6.25                          | 5.43                       | 0.413 | 0.0042                                        | 0.005                                     |
| 0.25              | 6.70                          | 5.59                       | 0.438 | 0.0031                                        | 0.006                                     |
| 0.50              | 6.67                          | 5.60                       | 0.439 | 0.0051                                        | 0.005                                     |
| 1.0               | 6.75                          | 5.94                       | 0.44  | 0.0022                                        | 0.006                                     |
| 2.0               | 6.75                          | 5.89                       | 0.44  | 0.0035                                        | 0.004                                     |

**S5. Rotational diffusion rates  $R_{\perp}$  and  $R_{||}$ , and order parameter  $S_0$  of 5PC in pure lipid vesicles vs. P/L ratio of WT FP at 37°C, pH7**

| peptide/lipid (%) | $R_{\perp}$ ( $10^7 s^{-1}$ ) | $R_{  }$ ( $10^7 s^{-1}$ ) | $S_0$ | $\delta S_0$<br>(uncertainty<br>from fitting) | $\delta S_0$<br>(ave over<br>experiments) |
|-------------------|-------------------------------|----------------------------|-------|-----------------------------------------------|-------------------------------------------|
| 0                 | 3.55                          | 3.94                       | 0.511 | 0.0017                                        | 0.007                                     |
| 0.125             | 3.56                          | 3.89                       | 0.512 | 0.0032                                        | 0.006                                     |
| 0.25              | 4.04                          | 4.17                       | 0.531 | 0.0025                                        | 0.005                                     |
| 0.50              | 3.92                          | 3.94                       | 0.531 | 0.0008                                        | 0.008                                     |
| 1.0               | 3.75                          | 4.01                       | 0.533 | 0.0012                                        | 0.005                                     |
| 2.0               | 3.74                          | 4.01                       | 0.532 | 0.0019                                        | 0.004                                     |

**S6. Rotational diffusion rates  $R_{\perp}$  and  $R_{||}$ , and order parameter  $S_0$  of 14PC in pure lipid vesicles vs. P/L ratio of WT FP at 37°C, pH7**

| peptide/lipid (%) | $R_{\perp}$ ( $10^8 s^{-1}$ ) | $R_{  }$ ( $10^9 s^{-1}$ ) | $S_0$ | $\delta S_0$<br>(uncertainty<br>from fitting) | $\delta S_0$<br>(ave over<br>experiments) |
|-------------------|-------------------------------|----------------------------|-------|-----------------------------------------------|-------------------------------------------|
| 0                 | 1.35                          | 1.84                       | 0.242 | 0.0009                                        | 0.006                                     |
| 0.125             | 1.25                          | 1.91                       | 0.242 | 0.0031                                        | 0.004                                     |
| 0.25              | 1.35                          | 1.94                       | 0.243 | 0.0012                                        | 0.004                                     |
| 0.50              | 1.35                          | 1.94                       | 0.243 | 0.0034                                        | 0.006                                     |
| 1.0               | 1.34                          | 1.85                       | 0.243 | 0.0026                                        | 0.008                                     |
| 2.0               | 1.35                          | 1.84                       | 0.243 | 0.0021                                        | 0.006                                     |

**S7. Rotational diffusion rates  $R_{\perp}$  and  $R_{||}$ , and order parameter  $S_0$  of DPPTC in 0.5% TMD reconstituted vesicles vs. P/L ratio of WT FP at 37°C, pH5**

| peptide/lipid (%) | $R_{\perp}$ ( $10^7 s^{-1}$ ) | $R_{  }$ ( $10^8 s^{-1}$ ) | $S_0$ | $\delta S_0$<br>(uncertainty<br>from fitting) | $\delta S_0$<br>(ave over<br>experiments) |
|-------------------|-------------------------------|----------------------------|-------|-----------------------------------------------|-------------------------------------------|
| 0                 | 6.17                          | 4.74                       | 0.431 | 0.0038                                        | 0.006                                     |
| 0.125             | 6.24                          | 4.23                       | 0.452 | 0.0025                                        | 0.008                                     |
| 0.25              | 6.71                          | 4.59                       | 0.501 | 0.0051                                        | 0.007                                     |
| 0.50              | 6.58                          | 4.21                       | 0.514 | 0.0035                                        | 0.006                                     |
| 1.0               | 6.98                          | 4.12                       | 0.531 | 0.0019                                        | 0.007                                     |
| 2.0               | 6.95                          | 4.18                       | 0.531 | 0.0038                                        | 0.006                                     |

**S8. Rotational diffusion rates  $R_{\perp}$  and  $R_{||}$ , and order parameter  $S_0$  of 5PC in 0.5% TMD reconstituted vesicles vs. P/L ratio of WT FP at 37°C, pH5**

| peptide/lipid (%) | $R_{\perp}$ ( $10^7 s^{-1}$ ) | $R_{  }$ ( $10^7 s^{-1}$ ) | $S_0$ | $\delta S_0$<br>(uncertainty<br>from fitting) | $\delta S_0$<br>(ave over<br>experiments) |
|-------------------|-------------------------------|----------------------------|-------|-----------------------------------------------|-------------------------------------------|
| 0                 | 3.45                          | 3.58                       | 0.532 | 0.0032                                        | 0.005                                     |
| 0.125             | 3.86                          | 3.37                       | 0.544 | 0.0009                                        | 0.006                                     |
| 0.25              | 3.94                          | 3.26                       | 0.575 | 0.0012                                        | 0.007                                     |
| 0.50              | 4.01                          | 3.25                       | 0.589 | 0.0023                                        | 0.005                                     |
| 1.0               | 4.12                          | 3.26                       | 0.603 | 0.0032                                        | 0.008                                     |
| 2.0               | 4.12                          | 3.27                       | 0.605 | 0.0016                                        | 0.007                                     |

**S9. Rotational diffusion rates  $R_{\perp}$  and  $R_{||}$ , and order parameter  $S_0$  of 14PC in 0.5% TMD reconstituted vesicles vs. P/L ratio of WT FP at 37°C, pH5**

| peptide/lipid (%) | $R_{\perp}$ ( $10^8 s^{-1}$ ) | $R_{  }$ ( $10^9 s^{-1}$ ) | $S_0$ | $\delta S_0$<br>(uncertainty<br>from fitting) | $\delta S_0$<br>(ave over<br>experiments) |
|-------------------|-------------------------------|----------------------------|-------|-----------------------------------------------|-------------------------------------------|
| 0                 | 1.10                          | 1.75                       | 0.251 | 0.0025                                        | 0.005                                     |
| 0.125             | 1.20                          | 1.79                       | 0.257 | 0.0008                                        | 0.005                                     |
| 0.25              | 1.38                          | 1.92                       | 0.272 | 0.0036                                        | 0.006                                     |
| 0.50              | 1.42                          | 2.03                       | 0.284 | 0.0027                                        | 0.007                                     |
| 1.0               | 1.43                          | 2.03                       | 0.285 | 0.0050                                        | 0.008                                     |
| 2.0               | 1.42                          | 2.03                       | 0.286 | 0.0050                                        | 0.007                                     |

**S10. Rotational diffusion rates  $R_{\perp}$  and  $R_{||}$ , and order parameter  $S_0$  of DPPTC in 0.5% TMD reconstituted vesicles vs. P/L ratio of WT FP at 37°C, pH7**

| peptide/lipid (%) | $R_{\perp}$ ( $10^7 s^{-1}$ ) | $R_{  }$ ( $10^8 s^{-1}$ ) | $S_0$ | $\delta S_0$<br>(uncertainty<br>from fitting) | $\delta S_0$<br>(ave over<br>experiments) |
|-------------------|-------------------------------|----------------------------|-------|-----------------------------------------------|-------------------------------------------|
| 0                 | 6.16                          | 5.24                       | 0.428 | 0.0015                                        | 0.004                                     |
| 0.125             | 6.38                          | 5.01                       | 0.448 | 0.0049                                        | 0.003                                     |
| 0.25              | 6.49                          | 4.88                       | 0.496 | 0.0032                                        | 0.005                                     |
| 0.50              | 6.50                          | 4.76                       | 0.502 | 0.0009                                        | 0.006                                     |
| 1.0               | 6.55                          | 4.65                       | 0.511 | 0.0017                                        | 0.004                                     |
| 2.0               | 6.52                          | 4.58                       | 0.513 | 0.0021                                        | 0.003                                     |

**S11. Rotational diffusion rates  $R_{\perp}$  and  $R_{||}$ , and order parameter  $S_0$  of 5PC in 0.5% TMD reconstituted vesicles vs. P/L ratio of WT FP at 37°C, pH7**

| peptide/lipid (%) | $R_{\perp}$ ( $10^7 s^{-1}$ ) | $R_{  }$ ( $10^7 s^{-1}$ ) | $S_0$ | $\delta S_0$<br>(uncertainty<br>from fitting) | $\delta S_0$<br>(ave over<br>experiments) |
|-------------------|-------------------------------|----------------------------|-------|-----------------------------------------------|-------------------------------------------|
| 0                 | 3.57                          | 3.68                       | 0.531 | 0.0035                                        | 0.005                                     |
| 0.125             | 3.57                          | 3.86                       | 0.545 | 0.0020                                        | 0.005                                     |
| 0.25              | 3.79                          | 3.49                       | 0.576 | 0.0020                                        | 0.004                                     |
| 0.50              | 3.68                          | 3.85                       | 0.585 | 0.0017                                        | 0.003                                     |
| 1.0               | 3.68                          | 3.91                       | 0.591 | 0.0016                                        | 0.006                                     |
| 2.0               | 3.89                          | 3.78                       | 0.592 | 0.0012                                        | 0.007                                     |



**S12. Rotational diffusion rates  $R_{\perp}$  and  $R_{\parallel}$ , and order parameter  $S_0$  of 14PC in 0.5% TMD reconstituted vesicles vs. P/L ratio of WT FP at 37°C, pH7**

| peptide/lipid (%) | $R_{\perp}$ ( $10^8 s^{-1}$ ) | $R_{\parallel}$ ( $10^9 s^{-1}$ ) | $S_0$ | $\delta S_0$<br>(uncertainty<br>from fitting) | $\delta S_0$<br>(ave over<br>experiments) |
|-------------------|-------------------------------|-----------------------------------|-------|-----------------------------------------------|-------------------------------------------|
| 0                 | 1.06                          | 1.75                              | 0.251 | 0.0021                                        | 0.007                                     |
| 0.125             | 1.08                          | 1.73                              | 0.256 | 0.0015                                        | 0.006                                     |
| 0.25              | 1.89                          | 1.70                              | 0.276 | 0.0023                                        | 0.007                                     |
| 0.50              | 1.74                          | 1.59                              | 0.287 | 0.0019                                        | 0.006                                     |
| 1.0               | 1.89                          | 1.49                              | 0.288 | 0.0009                                        | 0.005                                     |
| 2.0               | 1.85                          | 1.44                              | 0.288 | 0.0011                                        | 0.004                                     |

**S13. Rotational diffusion rates  $R_{\perp}$  and  $R_{\parallel}$ , and order parameter  $S_0$  of DPPTC in pure lipid vesicles vs. P/L ratio of G1S FP at 37°C, pH5**

| peptide/lipid (%) | $R_{\perp}$ ( $10^7 s^{-1}$ ) | $R_{\parallel}$ ( $10^8 s^{-1}$ ) | $S_0^*$ |
|-------------------|-------------------------------|-----------------------------------|---------|
| 0                 | 6.19                          | 4.99                              | 0.412   |
| 0.125             | 6.23                          | 4.79                              | 0.412   |
| 0.25              | 6.51                          | 5.07                              | 0.445   |
| 0.50              | 6.42                          | 4.86                              | 0.443   |
| 1.0               | 6.80                          | 4.95                              | 0.444   |
| 2.0               | 6.58                          | 4.96                              | 0.446   |

\* The  $R_{\perp}$  and  $R_{\parallel}$  and  $S_0$  are the average of two experiments on the mutants.

**S14. Rotational diffusion rates  $R_{\perp}$  and  $R_{\parallel}$ , and order parameter  $S_0$  of 5PC in pure lipid vesicles vs. P/L ratio of G1S FP at 37°C, pH5**

| peptide/lipid (%) | $R_{\perp}$ ( $10^7 s^{-1}$ ) | $R_{\parallel}$ ( $10^7 s^{-1}$ ) | $S_0$ |
|-------------------|-------------------------------|-----------------------------------|-------|
| 0                 | 3.50                          | 4.20                              | 0.512 |
| 0.125             | 3.71                          | 4.08                              | 0.512 |
| 0.25              | 3.99                          | 4.38                              | 0.535 |
| 0.50              | 3.96                          | 4.22                              | 0.536 |
| 1.0               | 3.93                          | 4.27                              | 0.536 |
| 2.0               | 3.93                          | 4.36                              | 0.536 |

**S15. Rotational diffusion rates  $R_{\perp}$  and  $R_{\parallel}$ , and order parameter  $S_0$  of 14PC in pure lipid vesicles vs. P/L ratio of G1S FP at 37°C, pH5**

| peptide/lipid (%) | $R_{\perp}$ ( $10^8 s^{-1}$ ) | $R_{\parallel}$ ( $10^9 s^{-1}$ ) | $S_0$ |
|-------------------|-------------------------------|-----------------------------------|-------|
| 0                 | 1.31                          | 1.89                              | 0.247 |
| 0.125             | 1.20                          | 1.88                              | 0.245 |
| 0.25              | 1.18                          | 1.75                              | 0.246 |
| 0.50              | 1.19                          | 1.74                              | 0.245 |
| 1.0               | 1.21                          | 1.73                              | 0.247 |
| 2.0               | 1.21                          | 1.80                              | 0.247 |

**S16. Rotational diffusion rates  $R_{\perp}$  and  $R_{\parallel}$ , and order parameter  $S_0$  of DPPTC in 0.5% TMD reconstituted vesicles vs. P/L ratio of G1S FP at 37°C, pH5**

| peptide/lipid (%) | $R_{\perp}$ ( $10^7 s^{-1}$ ) | $R_{\parallel}$ ( $10^8 s^{-1}$ ) | $S_0$ |
|-------------------|-------------------------------|-----------------------------------|-------|
| 0                 | 6.16                          | 5.18                              | 0.431 |
| 0.125             | 6.31                          | 5.27                              | 0.431 |
| 0.25              | 6.60                          | 5.39                              | 0.457 |
| 0.50              | 6.54                          | 4.88                              | 0.459 |
| 1.0               | 6.76                          | 5.01                              | 0.461 |
| 2.0               | 6.73                          | 5.16                              | 0.461 |

**S17. Rotational diffusion rates  $R_{\perp}$  and  $R_{\parallel}$ , and order parameter  $S_0$  of 5PC in 0.5% TMD reconstituted vesicles vs. P/L ratio of G1S FP at 37°C, pH5**

| peptide/lipid (%) | $R_{\perp}$ ( $10^7 s^{-1}$ ) | $R_{\parallel}$ ( $10^7 s^{-1}$ ) | $S_0$ |
|-------------------|-------------------------------|-----------------------------------|-------|
| 0                 | 3.68                          | 3.63                              | 0.532 |
| 0.125             | 3.49                          | 3.61                              | 0.533 |
| 0.25              | 3.79                          | 3.37                              | 0.567 |
| 0.50              | 3.31                          | 3.54                              | 0.569 |
| 1.0               | 3.42                          | 3.57                              | 0.571 |
| 2.0               | 3.51                          | 3.52                              | 0.571 |

**S18. Rotational diffusion rates  $R_{\perp}$  and  $R_{||}$ , and order parameter  $S_0$  of 14PC in 0.5% TMD reconstituted vesicles vs. P/L ratio of G1S FP at 37°C, pH5**

| peptide/lipid (%) | $R_{\perp}$ ( $10^8 s^{-1}$ ) | $R_{  }$ ( $10^9 s^{-1}$ ) | $S_0$ |
|-------------------|-------------------------------|----------------------------|-------|
| 0                 | 1.08                          | 1.75                       | 0.251 |
| 0.125             | 1.14                          | 1.76                       | 0.254 |
| 0.25              | 1.61                          | 1.81                       | 0.253 |
| 0.50              | 1.57                          | 1.80                       | 0.253 |
| 1.0               | 1.64                          | 1.74                       | 0.254 |
| 2.0               | 1.62                          | 1.71                       | 0.254 |

**S19. Rotational diffusion rates  $R_{\perp}$  and  $R_{||}$ , and order parameter  $S_0$  of DPPTC in pure lipid vesicles vs. P/L ratio of G1V FP at 37°C, pH5**

| peptide/lipid (%) | $R_{\perp}$ ( $10^7 s^{-1}$ ) | $R_{  }$ ( $10^8 s^{-1}$ ) | $S_0$ |
|-------------------|-------------------------------|----------------------------|-------|
| 0                 | 6.19                          | 5.05                       | 0.412 |
| 0.125             | 6.23                          | 4.83                       | 0.412 |
| 0.25              | 6.57                          | 4.95                       | 0.419 |
| 0.50              | 6.49                          | 4.61                       | 0.421 |
| 1.0               | 6.82                          | 4.59                       | 0.423 |
| 2.0               | 6.67                          | 4.64                       | 0.423 |

**S20. Rotational diffusion rates  $R_{\perp}$  and  $R_{||}$ , and order parameter  $S_0$  of 5PC in pure lipid vesicles vs. P/L ratio of G1V FP at 37°C, pH5**

| peptide/lipid (%) | $R_{\perp}$ ( $10^7 s^{-1}$ ) | $R_{  }$ ( $10^7 s^{-1}$ ) | $S_0$ |
|-------------------|-------------------------------|----------------------------|-------|
| 0                 | 3.57                          | 4.05                       | 0.512 |
| 0.125             | 3.64                          | 3.93                       | 0.512 |
| 0.25              | 3.84                          | 4.15                       | 0.513 |
| 0.50              | 3.66                          | 4.01                       | 0.513 |
| 1.0               | 3.73                          | 4.05                       | 0.515 |
| 2.0               | 3.84                          | 4.11                       | 0.515 |

**S21. Rotational diffusion rates  $R_{\perp}$  and  $R_{\parallel}$ , and order parameter  $S_0$  of 14PC in pure lipid vesicles vs. P/L ratio of G1V FP at 37°C, pH5**

| peptide/lipid (%) | $R_{\perp}$ ( $10^8 s^{-1}$ ) | $R_{\parallel}$ ( $10^9 s^{-1}$ ) | $S_0$ |
|-------------------|-------------------------------|-----------------------------------|-------|
| 0                 | 1.17                          | 1.86                              | 0.247 |
| 0.125             | 1.20                          | 1.87                              | 0.246 |
| 0.25              | 1.45                          | 1.81                              | 0.247 |
| 0.50              | 1.45                          | 1.82                              | 0.247 |
| 1.0               | 1.47                          | 1.80                              | 0.246 |
| 2.0               | 1.46                          | 1.85                              | 0.247 |

**S22. Rotational diffusion rates  $R_{\perp}$  and  $R_{\parallel}$ , and order parameter  $S_0$  of DPPTC in 0.5% TMD reconstituted vesicles vs. P/L ratio of G1V FP at 37°C, pH5**

| peptide/lipid (%) | $R_{\perp}$ ( $10^7 s^{-1}$ ) | $R_{\parallel}$ ( $10^8 s^{-1}$ ) | $S_0$ |
|-------------------|-------------------------------|-----------------------------------|-------|
| 0                 | 6.16                          | 5.12                              | 0.431 |
| 0.125             | 6.30                          | 5.25                              | 0.431 |
| 0.25              | 6.53                          | 5.53                              | 0.436 |
| 0.50              | 6.47                          | 5.15                              | 0.437 |
| 1.0               | 6.74                          | 5.42                              | 0.436 |
| 2.0               | 6.64                          | 5.55                              | 0.437 |

**S23. Rotational diffusion rates  $R_{\perp}$  and  $R_{\parallel}$ , and order parameter  $S_0$  of 5PC in 0.5% TMD reconstituted vesicles vs. P/L ratio of G1V FP at 37°C, pH5**

| peptide/lipid (%) | $R_{\perp}$ ( $10^7 s^{-1}$ ) | $R_{\parallel}$ ( $10^7 s^{-1}$ ) | $S_0$ |
|-------------------|-------------------------------|-----------------------------------|-------|
| 0                 | 3.62                          | 3.77                              | 0.532 |
| 0.125             | 3.56                          | 3.76                              | 0.533 |
| 0.25              | 3.94                          | 3.58                              | 0.534 |
| 0.50              | 3.60                          | 3.75                              | 0.534 |
| 1.0               | 3.61                          | 3.78                              | 0.531 |
| 2.0               | 3.60                          | 3.75                              | 0.534 |

**S24. Rotational diffusion rates  $R_{\perp}$  and  $R_{\parallel}$ , and order parameter  $S_0$  of 14PC in 0.5% TMD reconstituted vesicles vs. P/L ratio of G1V FP at 37°C, pH5**

| peptide/lipid (%) | $R_{\perp}$ ( $10^8 s^{-1}$ ) | $R_{\parallel}$ ( $10^9 s^{-1}$ ) | $S_0$ |
|-------------------|-------------------------------|-----------------------------------|-------|
| 0                 | 1.21                          | 1.78                              | 0.251 |
| 0.125             | 1.14                          | 1.77                              | 0.251 |
| 0.25              | 1.33                          | 1.75                              | 0.253 |
| 0.50              | 1.30                          | 1.72                              | 0.252 |
| 1.0               | 1.37                          | 1.68                              | 0.251 |
| 2.0               | 1.35                          | 1.67                              | 0.253 |

**S25. Rotational diffusion rates  $R_{\perp}$  and  $R_{\parallel}$ , and order parameter  $S_0$  of DPPTC in pure lipid vesicles vs. P/L ratio of W14A FP at 37°C, pH5**

| peptide/lipid (%) | $R_{\perp}$ ( $10^7 s^{-1}$ ) | $R_{\parallel}$ ( $10^8 s^{-1}$ ) | $S_0$ |
|-------------------|-------------------------------|-----------------------------------|-------|
| 0                 | 6.19                          | 5.00                              | 0.412 |
| 0.125             | 6.23                          | 4.83                              | 0.412 |
| 0.25              | 6.51                          | 5.09                              | 0.423 |
| 0.50              | 6.42                          | 4.91                              | 0.425 |
| 1.0               | 6.80                          | 5.03                              | 0.425 |
| 2.0               | 6.59                          | 5.04                              | 0.425 |

**S26. Rotational diffusion rates  $R_{\perp}$  and  $R_{\parallel}$ , and order parameter  $S_0$  of 5PC in pure lipid vesicles vs. P/L ratio of W14A FP at 37°C, pH5**

| peptide/lipid (%) | $R_{\perp}$ ( $10^7 s^{-1}$ ) | $R_{\parallel}$ ( $10^7 s^{-1}$ ) | $S_0$ |
|-------------------|-------------------------------|-----------------------------------|-------|
| 0                 | 3.50                          | 4.21                              | 0.512 |
| 0.125             | 3.71                          | 4.09                              | 0.512 |
| 0.25              | 3.99                          | 4.39                              | 0.514 |
| 0.50              | 3.97                          | 4.23                              | 0.513 |
| 1.0               | 3.94                          | 4.28                              | 0.514 |
| 2.0               | 3.93                          | 4.37                              | 0.513 |

**S27. Rotational diffusion rates  $R_{\perp}$  and  $R_{\parallel}$ , and order parameter  $S_0$  of 14PC in pure lipid vesicles vs. P/L ratio of W14A FP at 37°C, pH5**

| peptide/lipid (%) | $R_{\perp}$ ( $10^8 s^{-1}$ ) | $R_{\parallel}$ ( $10^9 s^{-1}$ ) | $S_0$ |
|-------------------|-------------------------------|-----------------------------------|-------|
| 0                 | 1.23                          | 1.89                              | 0.247 |
| 0.125             | 1.23                          | 1.88                              | 0.247 |
| 0.25              | 1.37                          | 1.76                              | 0.248 |
| 0.50              | 1.39                          | 1.75                              | 0.244 |
| 1.0               | 1.39                          | 1.74                              | 0.245 |
| 2.0               | 1.39                          | 1.81                              | 0.246 |

**S28. Rotational diffusion rates  $R_{\perp}$  and  $R_{\parallel}$ , and order parameter  $S_0$  of DPPTC in 0.5% TMD reconstituted vesicles vs. P/L ratio of W14A FP at 37°C, pH5**

| peptide/lipid (%) | $R_{\perp}$ ( $10^7 s^{-1}$ ) | $R_{\parallel}$ ( $10^8 s^{-1}$ ) | $S_0$ |
|-------------------|-------------------------------|-----------------------------------|-------|
| 0                 | 6.17                          | 5.18                              | 0.431 |
| 0.125             | 6.31                          | 5.28                              | 0.433 |
| 0.25              | 6.60                          | 5.42                              | 0.439 |
| 0.50              | 6.54                          | 4.89                              | 0.444 |
| 1.0               | 6.77                          | 5.03                              | 0.442 |
| 2.0               | 6.74                          | 5.20                              | 0.443 |

**S29. Rotational diffusion rates  $R_{\perp}$  and  $R_{\parallel}$ , and order parameter  $S_0$  of 5PC in 0.5% TMD reconstituted vesicles vs. P/L ratio of W14A FP at 37°C, pH5**

| peptide/lipid (%) | $R_{\perp}$ ( $10^7 s^{-1}$ ) | $R_{\parallel}$ ( $10^7 s^{-1}$ ) | $S_0$ |
|-------------------|-------------------------------|-----------------------------------|-------|
| 0                 | 3.69                          | 3.63                              | 0.532 |
| 0.125             | 3.49                          | 3.62                              | 0.538 |
| 0.25              | 3.79                          | 3.38                              | 0.549 |
| 0.50              | 3.33                          | 3.55                              | 0.557 |
| 1.0               | 3.43                          | 3.59                              | 0.558 |
| 2.0               | 3.53                          | 3.53                              | 0.557 |

**S30. Rotational diffusion rates  $R_{\perp}$  and  $R_{\parallel}$ , and order parameter  $S_0$  of 14PC in 0.5% TMD reconstituted vesicles vs. P/L ratio of W14A FP at 37°C, pH5**

| peptide/lipid (%) | $R_{\perp}$ ( $10^8 s^{-1}$ ) | $R_{\parallel}$ ( $10^9 s^{-1}$ ) | $S_0$ |
|-------------------|-------------------------------|-----------------------------------|-------|
| 0                 | 1.17                          | 1.75                              | 0.251 |
| 0.125             | 1.12                          | 1.76                              | 0.251 |
| 0.25              | 1.47                          | 1.81                              | 0.259 |
| 0.50              | 1.40                          | 1.81                              | 0.264 |
| 1.0               | 1.50                          | 1.76                              | 0.264 |
| 2.0               | 1.47                          | 1.74                              | 0.264 |

**S31. Rotational diffusion rates  $R_{\perp}$  and  $R_{\parallel}$ , and order parameter  $S_0$  of DPPTC in 0.5% K183E TMD reconstituted vesicles vs. P/L ratio of WT FP at 37°C, pH5**

| peptide/lipid (%) | $R_{\perp}$ ( $10^7 s^{-1}$ ) | $R_{\parallel}$ ( $10^8 s^{-1}$ ) | $S_0$ |
|-------------------|-------------------------------|-----------------------------------|-------|
| 0                 | 6.19                          | 5.15                              | 0.412 |
| 0.125             | 6.25                          | 5.30                              | 0.413 |
| 0.25              | 6.62                          | 5.52                              | 0.450 |
| 0.50              | 6.54                          | 5.09                              | 0.451 |
| 1.0               | 6.83                          | 5.33                              | 0.451 |
| 2.0               | 6.74                          | 5.47                              | 0.451 |

**S32. Rotational diffusion rates  $R_{\perp}$  and  $R_{\parallel}$ , and order parameter  $S_0$  of 5PC in 0.5% K183E TMD reconstituted vesicles vs. P/L ratio of WT FP at 37°C, pH5**

| peptide/lipid (%) | $R_{\perp}$ ( $10^7 s^{-1}$ ) | $R_{\parallel}$ ( $10^7 s^{-1}$ ) | $S_0$ |
|-------------------|-------------------------------|-----------------------------------|-------|
| 0                 | 3.62                          | 3.74                              | 0.512 |
| 0.125             | 3.56                          | 3.69                              | 0.512 |
| 0.25              | 3.84                          | 3.58                              | 0.546 |
| 0.50              | 3.50                          | 3.66                              | 0.556 |
| 1.0               | 3.58                          | 3.69                              | 0.557 |
| 2.0               | 3.66                          | 3.67                              | 0.557 |

**S33. Rotational diffusion rates  $R_{\perp}$  and  $R_{\parallel}$ , and order parameter  $S_0$  of 14PC in 0.5% K183E TMD reconstituted vesicles vs. P/L ratio of WT FP at 37°C, pH5**

| peptide/lipid (%) | $R_{\perp}$ ( $10^8 s^{-1}$ ) | $R_{\parallel}$ ( $10^9 s^{-1}$ ) | $S_0$ |
|-------------------|-------------------------------|-----------------------------------|-------|
| 0                 | 1.16                          | 1.82                              | 0.247 |
| 0.125             | 1.14                          | 1.84                              | 0.247 |
| 0.25              | 1.43                          | 1.85                              | 0.246 |
| 0.50              | 1.39                          | 1.87                              | 0.247 |
| 1.0               | 1.47                          | 1.84                              | 0.248 |
| 2.0               | 1.45                          | 1.85                              | 0.247 |

**S34. Rotational diffusion rates  $R_{\perp}$  and  $R_{\parallel}$ , and order parameter  $S_0$  of DPPTC in 0.5% L187A TMD reconstituted vesicles vs. P/L ratio of WT FP at 37°C, pH5**

| peptide/lipid (%) | $R_{\perp}$ ( $10^7 s^{-1}$ ) | $R_{\parallel}$ ( $10^8 s^{-1}$ ) | $S_0$ |
|-------------------|-------------------------------|-----------------------------------|-------|
| 0                 | 6.16                          | 5.02                              | 0.412 |
| 0.125             | 6.29                          | 4.78                              | 0.413 |
| 0.25              | 6.49                          | 4.95                              | 0.450 |
| 0.50              | 6.42                          | 4.67                              | 0.451 |
| 1.0               | 6.74                          | 4.67                              | 0.451 |
| 2.0               | 6.58                          | 4.70                              | 0.451 |

**S35. Rotational diffusion rates  $R_{\perp}$  and  $R_{\parallel}$ , and order parameter  $S_0$  of 5PC in 0.5% L187A TMD reconstituted vesicles vs. P/L ratio of WT FP at 37°C, pH5**

| peptide/lipid (%) | $R_{\perp}$ ( $10^7 s^{-1}$ ) | $R_{\parallel}$ ( $10^7 s^{-1}$ ) | $S_0$ |
|-------------------|-------------------------------|-----------------------------------|-------|
| 0                 | 3.56                          | 4.08                              | 0.512 |
| 0.125             | 3.63                          | 4.00                              | 0.512 |
| 0.25              | 3.94                          | 4.14                              | 0.546 |
| 0.50              | 3.76                          | 4.10                              | 0.556 |
| 1.0               | 3.76                          | 4.14                              | 0.557 |
| 2.0               | 3.77                          | 4.19                              | 0.557 |

**S36. Rotational diffusion rates  $R_{\perp}$  and  $R_{\parallel}$ , and order parameter  $S_0$  of 14PC in 0.5% L187A TMD reconstituted vesicles vs. P/L ratio of WT FP at 37°C, pH5**

| peptide/lipid (%) | $R_{\perp}$ ( $10^8 s^{-1}$ ) | $R_{\parallel}$ ( $10^9 s^{-1}$ ) | $S_0$ |
|-------------------|-------------------------------|-----------------------------------|-------|
| 0                 | 1.23                          | 1.82                              | 0.247 |
| 0.125             | 1.20                          | 1.79                              | 0.247 |
| 0.25              | 1.34                          | 1.71                              | 0.246 |
| 0.50              | 1.35                          | 1.68                              | 0.247 |
| 1.0               | 1.37                          | 1.64                              | 0.248 |
| 2.0               | 1.36                          | 1.67                              | 0.247 |

**S37. Populations, rotational diffusion rates  $R_{\perp}$ , and order parameter  $S_0$  of 5PC in 1% TMD reconstituted vesicles vs. P/L ratio of WT FP at 37°C, pH5**

| peptide/lipid (%) | $R_{\perp}$ ( $10^7 s^{-1}$ ) | $S_0$ | Population (%) |
|-------------------|-------------------------------|-------|----------------|
| 0                 |                               |       |                |
| Comp.1            | 4.10                          | 0.55  | 75             |
| Comp.2            | 6.46                          | 0.59  | 25             |
| 0.5               |                               |       |                |
| Comp.1            | 4.23                          | 0.52  | 63             |
| Comp.2            | 6.95                          | 0.69  | 37             |
| 1.0               |                               |       |                |
| Comp.1            | 4.44                          | 0.52  | 48             |
| Comp.2            | 6.85                          | 0.71  | 52             |

**S38. Populations, rotational diffusion rates  $R_{\perp}$ , and order parameter  $S_0$  of 5PC in 2% TMD reconstituted vesicles vs. P/L ratio of WT FP at 37°C, pH5**

| peptide/lipid (%) | $R_{\perp}$ ( $10^7 s^{-1}$ ) | $S_0$ | Relative population |
|-------------------|-------------------------------|-------|---------------------|
| 0                 |                               |       |                     |
| Comp.1            | 4.10                          | 0.54  | 70                  |
| Comp.2            | 9.14                          | 0.68  | 30                  |
| 0.5               |                               |       |                     |
| Comp.1            | 3.94                          | 0.47  | 59                  |
| Comp.2            | 10.2                          | 0.72  | 41                  |
| 1.0               |                               |       |                     |
| Comp.1            | 3.54                          | 0.42  | 50                  |
| Comp.2            | 10.5                          | 0.73  | 50                  |



**S39. Populations, rotational diffusion rates  $R_{\perp}$ , and order parameter  $S_0$  of 5PC in DMPC/DMPG/Chol vesicles with 1% TMD + 1% FP at 25°C, 30°C, and 37°C, pH5**

| Temperature | $R_{\perp}$ ( $10^7 s^{-1}$ ) | $S_0$ | Population (%) |
|-------------|-------------------------------|-------|----------------|
| 25°C        |                               |       |                |
| Comp.1      | 3.29                          | 0.56  | 45             |
| Comp.2      | 5.34                          | 0.75  | 55             |
| 30°C        |                               |       |                |
| Comp.1      | 4.12                          | 0.55  | 48             |
| Comp.2      | 6.19                          | 0.72  | 52             |
| 37°C        |                               |       |                |
| Comp.1      | 4.44                          | 0.52  | 48             |
| Comp.2      | 6.85                          | 0.71  | 52             |

**S40. Typical Correlation Matrixes of the fittings (A) 5PC in 1% FP in DMPC/DMPG/Chol MLV, pH5 and (B) 1% FP in 1% TMD reconstituted membranes, pH5.**

A)

|  |        |        |         |
|--|--------|--------|---------|
|  | RBAR   | C20    | C22     |
|  | 1.0000 | 0.0947 | -0.1602 |
|  |        | 1.0000 | 0.3433  |
|  |        |        | 1.0000  |

B)

|  |          |          |         |         |         |         |
|--|----------|----------|---------|---------|---------|---------|
|  | RBAR (1) | RBAR (2) | C20 (1) | C20 (2) | SITE1   | SITE2   |
|  | 1.0000   | -0.2719  | 0.3495  | 0.2801  | 0.2490  | -0.3088 |
|  |          | 1.0000   | -0.3500 | -0.1323 | -0.3668 | 0.2719  |
|  |          |          | 1.0000  | -0.2403 | 0.4784  | -0.1855 |
|  |          |          |         | 1.0000  | -0.0520 | -0.1969 |
|  |          |          |         |         | 1.0000  | -0.6079 |
|  |          |          |         |         |         | 1.0000  |

**S41.** Thermodynamic parameters of fusion peptide binding to lipid bilayers composed of POPC/POPG (4:1) at pH 5.

| <b>Titration</b>                                                | <b><math>\Delta H</math> (lipid)</b> | <b><math>\Delta H</math> (lipid +TMD)</b> | <b><math>\Delta H</math> (FP-TMD)</b> |
|-----------------------------------------------------------------|--------------------------------------|-------------------------------------------|---------------------------------------|
|                                                                 | kCal/mol                             | kCal/mol                                  | kCal/mol                              |
| <b>WT FP <math>\rightarrow</math> WT-TMD</b>                    | $-16.08 \pm 0.38$                    | $-21.75 \pm 0.54$                         | -5.67                                 |
| <b>G1S FP <math>\rightarrow</math> WT-TMD</b>                   | $-15.93 \pm 0.57$                    | $-17.38 \pm 0.33$                         | -1.45                                 |
| <b>G1V FP <math>\rightarrow</math> WT-TMD</b>                   | $-12.65 \pm 0.40$                    | $-11.99 \pm 0.27$                         | 0.66                                  |
| <b>W14A FP <math>\rightarrow</math> WT-TMD</b>                  | $-13.89 \pm 0.61$                    | $-17.08 \pm 0.34$                         | -3.19                                 |
| <b><math>\Delta</math>G1 FP <math>\rightarrow</math> WT-TMD</b> | $-9.57 \pm 0.32$                     | $-9.72 \pm 0.11$                          | -0.15                                 |
| <b>WT-FP <math>\rightarrow</math> K183E TMD</b>                 | $-16.08 \pm 0.38$                    | $-20.71 \pm 0.14$                         | -4.63                                 |
| <b>WT-FP <math>\rightarrow</math> L187A TMD</b>                 | $-16.08 \pm 0.38$                    | $-18.01 \pm 0.43$                         | -1.93                                 |

**Figure S1 Binding of FPs to lipid only or TMD-reconstituted POPC:POPG=4:1 SUVs at 37°C by isothermal titration calorimetry.**

A) Measurement of enthalpy change by titrating WT FP to a large excess of lipid and TMD. Left, WT-FP to lipid only SUVs; right, WT FP to TMD-reconstituted SUVs. We used the data starting from the 4th injection (arrow) to get rid of the unstable initial injections.

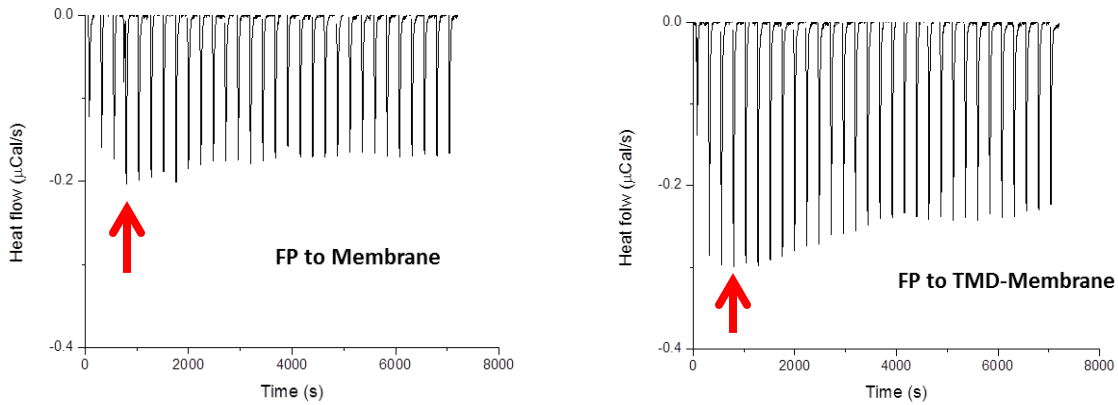

B) Reaction enthalpy of each injection during the titration, blue WT FP to WT-TMD reconstituted membrane; brown, WT FP to K183E TMD reconstituted membrane; green, WT FP to L187A TMD reconstituted membrane; purple, WT FP to lipid only membranes.

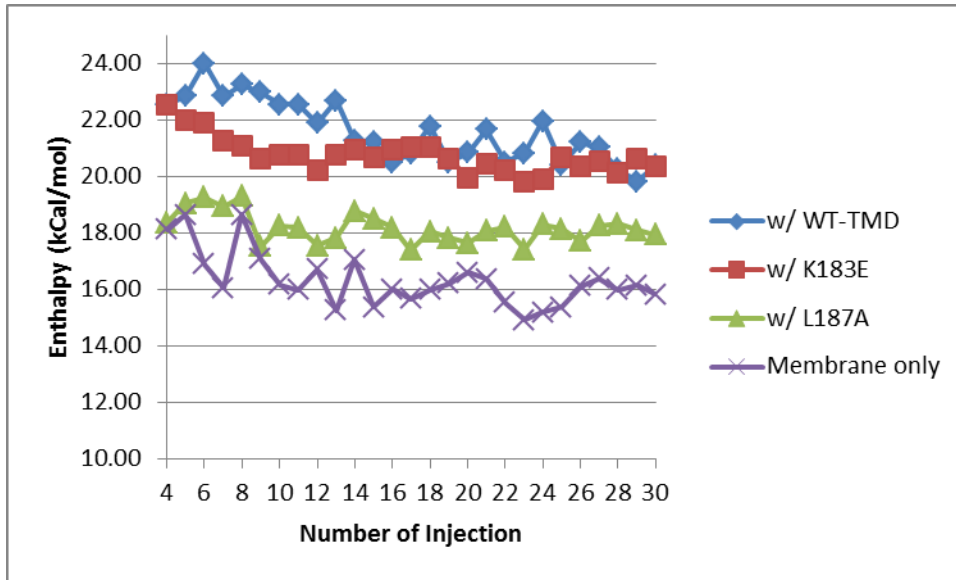

**Figure S2** ESR Spectra of 5PC in DMPC:DMPG:Chol=40:30:30 MLVs with 1% TMD, 1% TMD + 0.5% FP and 1% TMD+1% FP, and 2% TMD recorded at 37°C. The outer peak separations of the spectra are 53.86 G, 54.45 G, 55.33 G, and 54.94 G, respectively.

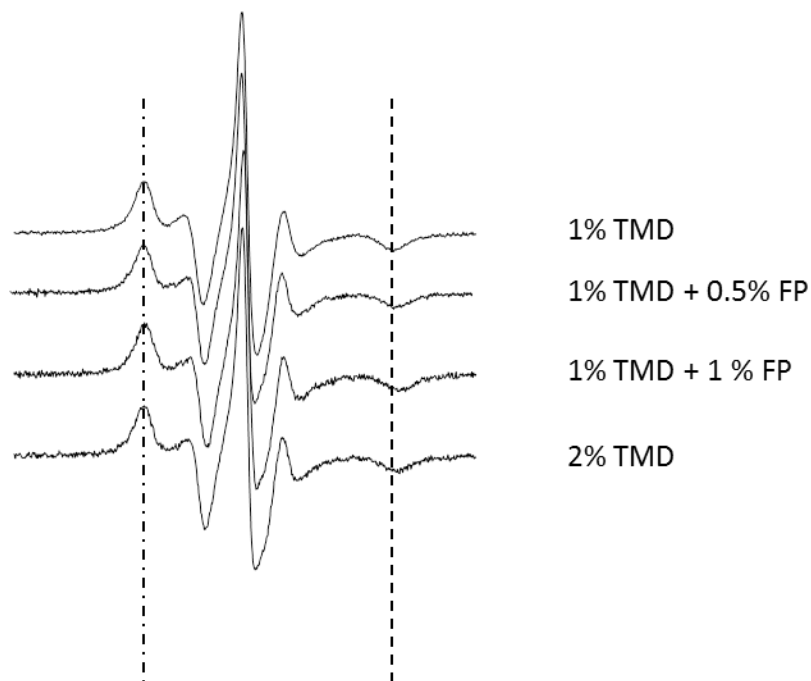

Figure S3 ESR Spectra of WT-F3R1 (A), G1S-FP-F3R1 (B), G1V-F3R1 (C) and WT-I18R1 (D) in DMPC:DMPG:Chol=40:30:30 LUV's without (black) and with (red) 0.5% TMD reconstituted at RT.

Figure SF3

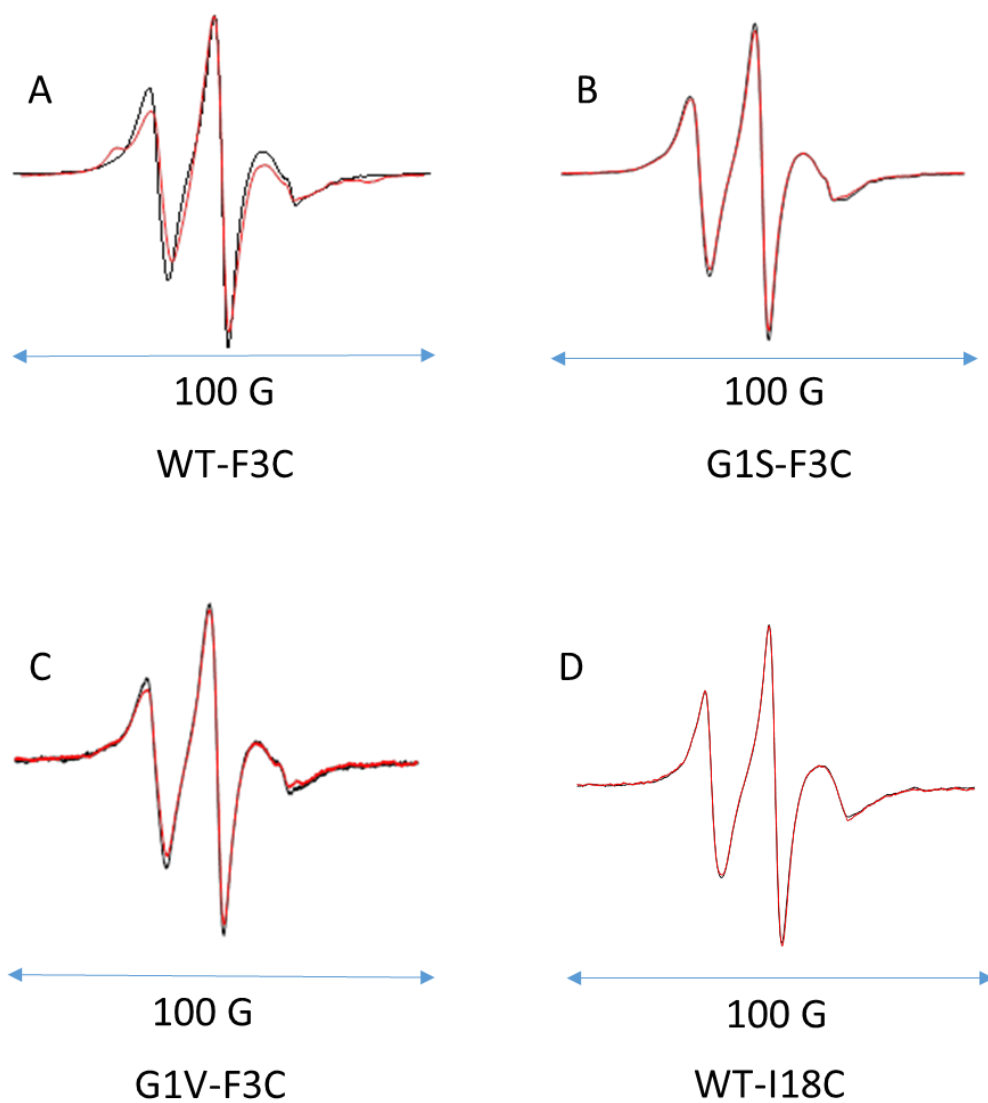

----- pure lipid membrane  
----- TMD-reconstituted membrane

**Figure S4. Representative ESR spectra of spin-labeled lipids in DMPC:DMPG:Chol=40:30:30 MLVs, showing the changes upon FP binding.** A-C), the spectra of DPPTC (A), 5PC (B) and 14PC (C) in 0.5% TMD-reconstituted membranes with 0.125% WT FP (black) and 0.5% WT FP (red). D-F), the spectra of DPPTC (D), 5PC (E) and 14PC (F) in 0.5% TMD-reconstituted membranes with 0.125% G1V FP (black) and 0.5% G1V-FP (red). G-I), comparing the spectra of DPPTC (G), 5PC (H) and 14PC (I) in TMD-reconstituted membranes (black) and pure lipid membranes (red) with 0.5% WT FP. The differences are magnified by 2x in the insets.

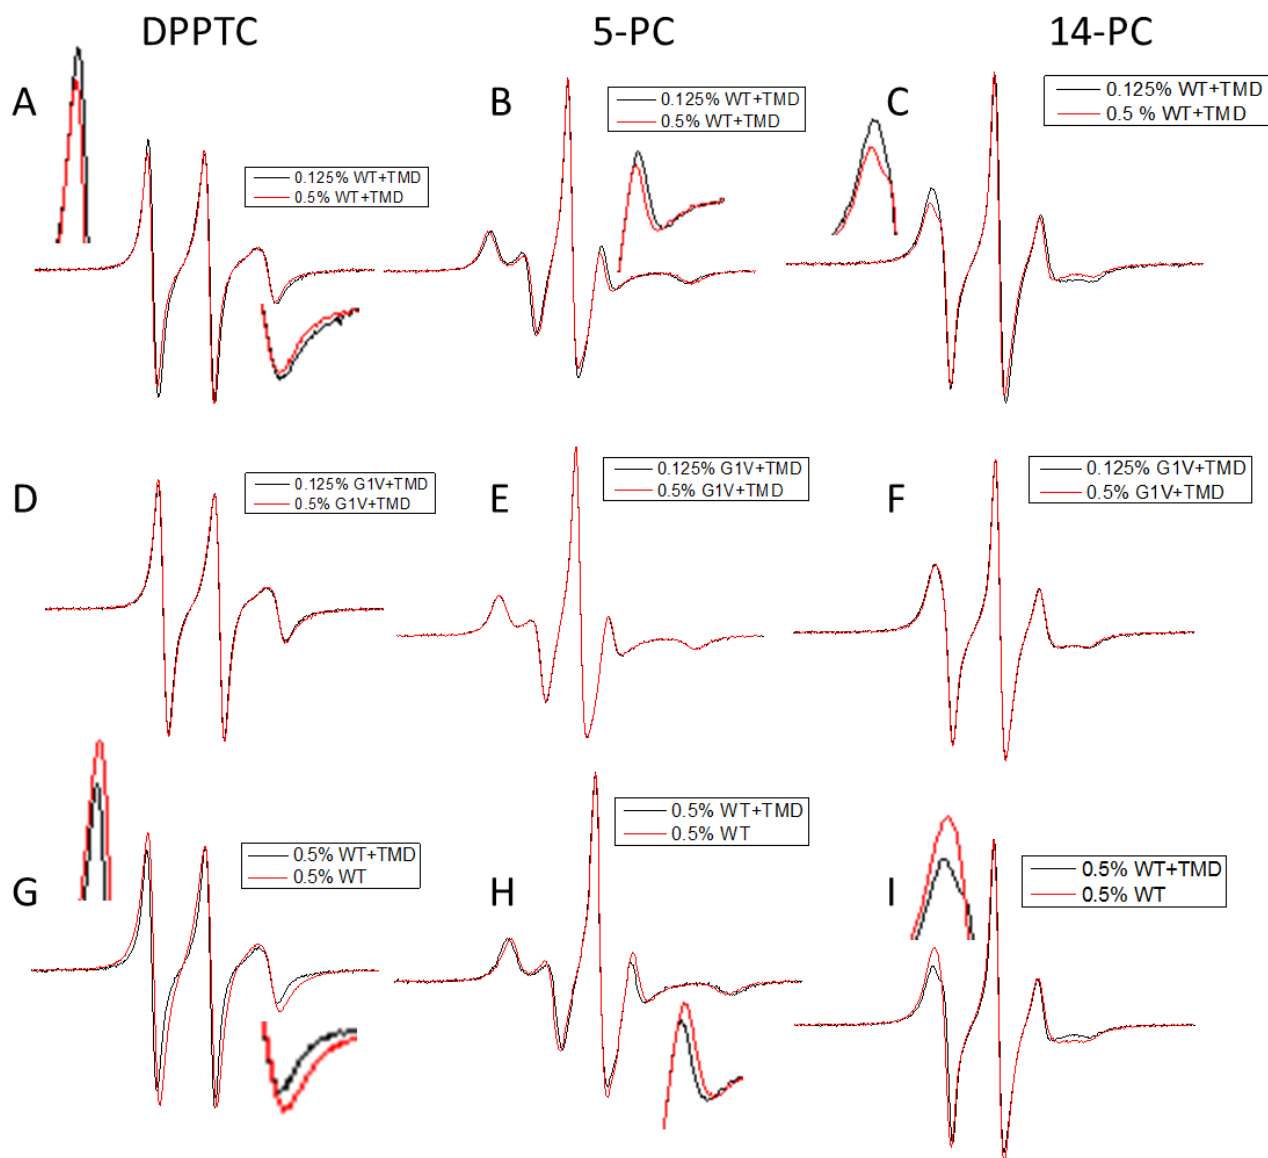

**Figure S5.** Plot of  $\Delta\Delta S_0$  of DPPTC (solid thick line), 5PC (solid thin line) and 14PC (dashed thick line) versus 23-mer FP concentration in DMPC:DMPG:Chol=40:30:30 MLV with 0.5% TMD. Black, pH7, red, pH5.

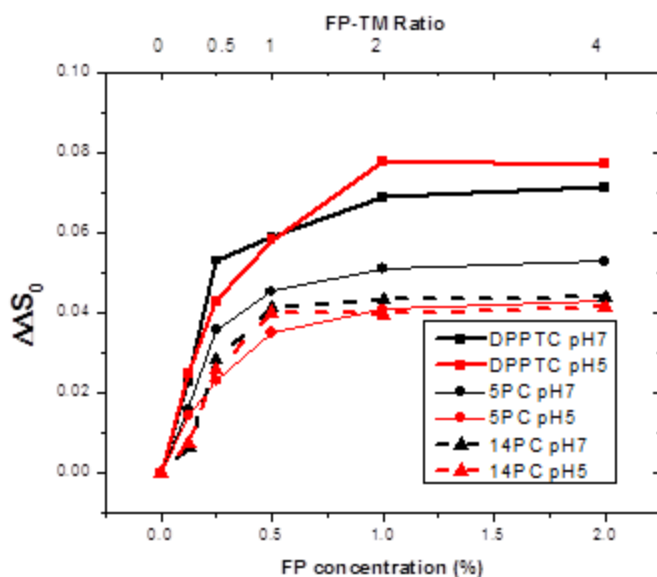

## Supporting Methods

### Two Component Fitting Strategy

The fitting strategy for two components described below was previously described in Ref 17. Initially the membranes were assumed to consist of a single phase, and the ESR spectra were analyzed as having only one spectral component as described in the main text. Then the parameters that would converge to the best fit were used as a “seed” or initial parameter set for the major component, and the second “seed” parameters were from the previous experiments of similar systems showing two components (Ref 3). The two sets of seed parameters were used to test the possibility of the existence of a second component. We compared the best fits of the one and two components by their respective  $\chi^2$ , and their correlation matrix and we examined the detailed features of the final simulation compared to the experimental spectrum (Ref 17). We found that the  $C_{22}$ 's were always small (-0.1 to 0.1) and only had a modest effect on the predicted spectrum, so we repeated the fitting using the  $C_{22}$ 's obtained in the fitting of both components. In the repeated fitting the values of  $S_0$  changed by no more than  $\pm 0.01$  from the original fitting. We report in Table S40 a typical correlation matrix for fitting to the reduced number of parameters. This fitting procedure provided a consistent set of results, yielding reproducible  $S_0$ 's and fractions of the two components both in fitting each experiment using several sets of seed values to initiate the fitting as well as over the fitting of three independent experiments. The correlation coefficients are less than 0.35 (Table S40) and the observed effect of  $C_{22}$  variation of the final value of  $S_0$  was less than 0.01. This fitting procedure provided a consistent set of results in terms of reproducible  $S_0$ 's and fractions of two components obtained in the fitting. We repeated the experiments on these two-component samples at two additional temperatures (25 and 30 °C) in addition to the original temperature (37 °C). Fitting these spectra yields the trend in  $R_{\text{bar}}$  and  $S_0$  (Table S39) which we expected based on our previous work (Ref 19) and little change in fractions of the components (also expected). The uncertainty in the  $S_0$  for both components is smaller than 0.03 and the uncertainty in the percentages of the components is smaller than  $\pm 1.5\%$ .
